# Supplementary material
Source: Springer Nature journal article supplement (https://www.springermedizin.de/resource/supplementary/12911_2011_560_MOESM2_ESM.pdf/9525964)

BWA server activity, week of 17<sup>th</sup> May 2010

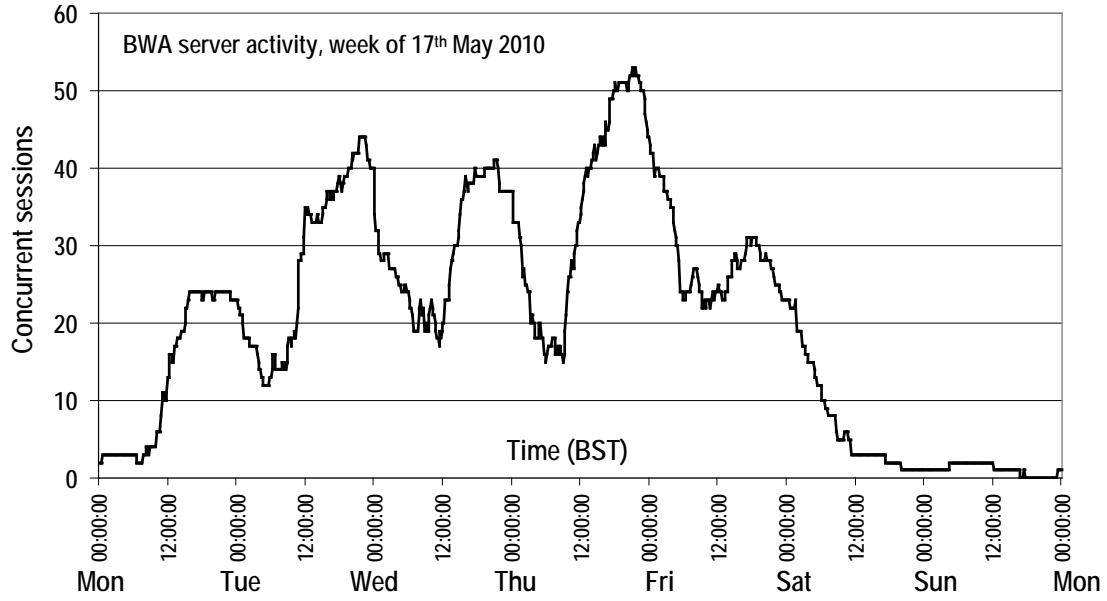

Supplement: MOESM2 [file 9525964]
